# Supplementary material for: Venous thromboembolism with use of hormonal contraception and non-steroidal anti-inflammatory drugs: nationwide cohort study
Source: PubMed Central journal article supplement — BMJ. 2023 Sep 6;382:e074450. doi: 10.1136/bmj-2022-074450 (PMC10480689; doi:10.1136/bmj-2022-074450), 2023-09-06
Supplement: meaa074450.ww1.pdf [file meaa074450.ww1.pdf]

## Supplementary Tables

**Table A:** Nationwide data sources used and definitions of variables of interest.

| Variables                                                   | Data source                                                                                | Period                | Classification                                                                                                                                            | Definition                                                                                                                                                                                                          |
|-------------------------------------------------------------|--------------------------------------------------------------------------------------------|-----------------------|-----------------------------------------------------------------------------------------------------------------------------------------------------------|---------------------------------------------------------------------------------------------------------------------------------------------------------------------------------------------------------------------|
| <b>Exclusion/Censoring criteria</b>                         |                                                                                            |                       |                                                                                                                                                           |                                                                                                                                                                                                                     |
| Any venous thromboembolism                                  | The Danish National Patient Registry                                                       | 1977-2017             | The International Classification of Diseases and Related Health Problems, 10th & 8th revision                                                             | G951F, H348E, H348F, I26, I636, I676, I8001-9, I81-2, O032, O037, O042, O047, O072, O077, O082, O223, O225, O882, O871, O873, 28944, 321, 37703, 450, 45100, 45108-9, 45190, 45192, 45199, 452-3, 59323, 671, 67399 |
| Any arterial thrombosis                                     |                                                                                            |                       |                                                                                                                                                           | G951G, H341A, H341B, I21, I240, I513, I630-5, I638, I639, I64, I74, K550C, K550H, N280A, N280, 37702, 410, 433-4, 444                                                                                               |
| Cancer, except non-melanoma skin cancer                     |                                                                                            |                       |                                                                                                                                                           | C, 14-20 - except C44, 173                                                                                                                                                                                          |
| Thrombophilia                                               |                                                                                            |                       |                                                                                                                                                           | D685, D686                                                                                                                                                                                                          |
| Hysterectomy                                                | The Danish National Patient Registry                                                       | 1977-2017             | The Danish Classification of Surgical Procedures & The Nordic Medico-Statistical Committee Classification of Surgical Procedures                          | KLCC10, KLCC11, KLCC20, KLCD, 61000, 61020, 61040, 61050, 61100, 72110, 72230, 72650                                                                                                                                |
| Bilateral oophorectomy                                      |                                                                                            |                       |                                                                                                                                                           | KLAE2, KLAFF1, 60120, 60121, 60320, 70210, 70310                                                                                                                                                                    |
| Second unilateral oophorectomy                              |                                                                                            |                       |                                                                                                                                                           | KLAE, KLAFF0, 60100, 60300, 60101, 70200                                                                                                                                                                            |
| Sterilisation                                               |                                                                                            |                       |                                                                                                                                                           | KLG, 60800, 60810, 60820, 60830, 60840                                                                                                                                                                              |
| Infertility treatment                                       | The Danish Register of Medicinal Product Statistics                                        | 1995-2017             | The Anatomical Therapeutic Chemical Classification System                                                                                                 | G03G                                                                                                                                                                                                                |
| <b>Confounding factors other than age and calendar time</b> |                                                                                            |                       |                                                                                                                                                           |                                                                                                                                                                                                                     |
| Polycystic ovary syndrome                                   | The Danish National Patient Register                                                       | 1977-2017             | The International Classification of Diseases and Related Health Problems, 10th & 8th revision                                                             | E282, 25690                                                                                                                                                                                                         |
| Endometriosis                                               |                                                                                            |                       |                                                                                                                                                           | N80, 6253                                                                                                                                                                                                           |
| Hypertension                                                | The Danish Register of Medicinal Product Statistics                                        | 1995-2017             | The Anatomical Therapeutic Chemical Classification System                                                                                                 | C02A, C02B, C02C, C02DA, C02DB, C02DD, C02DG, C02L, C03A, C03B, C03D, C03E, C03X, C07A, C07B, C07C, C07D, C07F, C08, C08G, C09AA, C09BA, C09BB, C09CA, C09DA, C09DB, C09XA02, C09XA52                               |
| Diabetes mellitus                                           | The Danish National Patient Register & The Danish Register of Medicinal Product Statistics | 1977-2017 & 1995-2017 | The International Classification of Diseases and Related Health Problems, 10th & 8th revision & The Anatomical Therapeutic Chemical Classification System | A10                                                                                                                                                                                                                 |
| Migraine                                                    |                                                                                            |                       |                                                                                                                                                           | G43, 346 & N02C                                                                                                                                                                                                     |
| Systemic connective                                         | The Danish                                                                                 | 1997-                 | The International                                                                                                                                         | M3, 446                                                                                                                                                                                                             |

|                                                       |                                                                                                                                                          |                                                     |                                                                                                  |                                                                                                                                                   |
|-------------------------------------------------------|----------------------------------------------------------------------------------------------------------------------------------------------------------|-----------------------------------------------------|--------------------------------------------------------------------------------------------------|---------------------------------------------------------------------------------------------------------------------------------------------------|
| tissue disorders<br>Inflammatory<br>polyarthropathies | National<br>Patient<br>Register                                                                                                                          | 2017                                                | Classification of Diseases<br>and Related Health<br>Problems, 10th & 8th<br>revision             | M05-14, 71                                                                                                                                        |
| Pregnancy                                             | The<br>Register of<br>Legally<br>Induced<br>Abortions &<br>The Danish<br>Medical<br>Birth<br>Register &<br>The Danish<br>National<br>Patient<br>Register | 1973-<br>2017 &<br>1973-<br>2017 &<br>1977-<br>2017 | The International<br>Classification of Diseases<br>and Related Health<br>Problems, 10th revision | Each observation in the Danish Medical Birth<br>Register and The Register of Legally Induced<br>Abortion included as a pregnancy &<br>O00-8       |
| Surgery                                               | The Danish<br>National<br>Patient<br>Register                                                                                                            | 1977-<br>2017                                       | The Nordic Medico-<br>Statistical Committee<br>Classification of Surgical<br>Procedures          | Each surgical procedure registered with a<br>hospital stay of $\geq 24$ hours                                                                     |
| Tranexamic acid                                       | The Danish<br>National<br>Register of<br>Medicinal<br>Product<br>Statistics                                                                              | 1995-<br>2017                                       | The Anatomical<br>Therapeutic Chemical<br>Classification System                                  | B02AA02                                                                                                                                           |
| Educational level                                     | The<br>Education<br>Register                                                                                                                             | 1981-<br>2017                                       | -                                                                                                | Elementary school only, secondary school<br>only, skilled worker, theoretical education,<br>theoretical education with research<br>qualifications |
| Body-mass index                                       | The Danish<br>Medical<br>Birth<br>Register                                                                                                               | 2004-<br>2017                                       | -                                                                                                | Weight in kilogram divided by height in m to<br>power of two: <18.5, 18.5-25, >25-30, >30                                                         |
| Smoking status                                        | The Danish<br>Medical<br>Birth<br>Register                                                                                                               | 1991-<br>2017                                       | -                                                                                                | Yes/no                                                                                                                                            |

**Table B: Hormonal contraception available during the study period**

| <b>Hormonal contraception</b>                     | <b>Anatomical Therapeutic Chemical code</b> |
|---------------------------------------------------|---------------------------------------------|
| <b>High risk of venous thromboembolic event</b>   |                                             |
| <i>Combined products</i>                          |                                             |
| Oral                                              |                                             |
| 50 micrograms ethinyl oestradiol                  |                                             |
| Norethisterone                                    | G03AA01, G03AA03, G03AA05                   |
| Levonorgestrel                                    | G03AA07                                     |
| 20-40 micrograms ethinyl oestradiol               |                                             |
| Desogestrel                                       | G03AA09, G03AB05                            |
| Gestodene                                         | G03AA10, G03AB06                            |
| Drospirenone                                      | G03AA12                                     |
| Cyproterone                                       | G03HB01                                     |
| Patch                                             |                                             |
| 33.9 micrograms ethinyl oestradiol/24 h           |                                             |
| Norelgestromine                                   | G03AA13                                     |
| Vaginal Ring                                      |                                             |
| 15 micrograms ethinyl oestradiol/24 h             |                                             |
| Etonogestrel                                      | G02BB01                                     |
| <b>Medium risk of venous thromboembolic event</b> |                                             |
| <i>Combined products</i>                          |                                             |
| Oral                                              |                                             |
| 20-40 micrograms ethinyl oestradiol               |                                             |
| Norethisterone                                    | G03AA01, G03AA05, G03AB04                   |
| Levonorgestrel                                    | G03AA07, G03AB03                            |
| Norgestimate                                      | G03AA11                                     |
| Natural oestrogen                                 |                                             |
| Dienogest                                         | G03AB08                                     |
| Nomegestrol acetate                               | G03AA14                                     |
| <i>Progestin-only</i>                             |                                             |
| Injection                                         |                                             |
| Medroxyprogesterone                               | G03AC06                                     |
| <b>Low/no risk of venous thromboembolic event</b> |                                             |
| <i>Progestin-only</i>                             |                                             |
| Oral                                              |                                             |
| Norethisterone                                    | G03AC01, G03AC02                            |
| Levonorgestrel                                    | G03AC03                                     |
| Desogestrel                                       | G03AC09                                     |
| Implant                                           |                                             |
| Etonogestrel                                      | G03AC08                                     |
| Intrauterine device                               |                                             |
| Levonorgestrel                                    | G02BA03                                     |

**Table C: NSAIDs available during the study period**

| <b>NSAID</b>     | <b>Anatomical Therapeutic Chemical code</b> |
|------------------|---------------------------------------------|
| Aceclofenac      | M01AB16                                     |
| Celecoxib        | M01AH01                                     |
| Dexibuprofen     | M01AE14                                     |
| Dexketoprofen    | M01AE17                                     |
| Diclofenac*      | M01AB05, M01AB55                            |
| Etodolac         | M01AB08                                     |
| Etoricoxib       | M01AH05                                     |
| Fenbufen         | M01AE05                                     |
| Fenoprofen       | M01AE04                                     |
| Flurbiprofen     | M01AE09                                     |
| Ibuprofen**      | M01AE01, M01AE51                            |
| Indomethacin     | M01AB01                                     |
| Ketoprofen       | M01AE03                                     |
| Ketorolac        | M01AB15                                     |
| Lornoxicam       | M01AC05                                     |
| Meloxicam        | M01AC06                                     |
| Nabumetone       | M01AX01                                     |
| Naproxen         | M01AE02, M01AE52                            |
| Parecoxib        | M01AH04                                     |
| Phenylbutazone   | M01AA01                                     |
| Piroxicam        | M01AC01                                     |
| Rofecoxib        | M01AH02                                     |
| Sulindac         | M01AB02                                     |
| Tenoxicam        | M01AC02                                     |
| Tiaprofenic acid | M01AE11                                     |
| Tolfenamic acid  | M01AG02                                     |
| Tolmetin         | M01AB03                                     |

\* Diclofenac 12.5 mg tablets were available over-the-counter in 2007-2008

\*\* Ibuprofen 200 mg tablets were available over-the-counter throughout the study period.

**Table D:** *Exclusion and censoring criteria for a sub-population of “healthy” women*

| Variable                                         | Data source                                                                                         | Period of availability | Classification                                                                                                                                            | Definition                                                                                                                                                                                                          |
|--------------------------------------------------|-----------------------------------------------------------------------------------------------------|------------------------|-----------------------------------------------------------------------------------------------------------------------------------------------------------|---------------------------------------------------------------------------------------------------------------------------------------------------------------------------------------------------------------------|
| <b><u>Exclusion/Censoring criteria</u></b>       |                                                                                                     |                        |                                                                                                                                                           |                                                                                                                                                                                                                     |
| Any venous thromboembolism                       | The Danish National Patient Registry                                                                | 1977-2017              | The International Classification of Diseases and Related Health Problems, 10th & 8th revision                                                             | G951F, H348E, H348F, I26, I636, I676, I8001-9, I81-2, O032, O037, O042, O047, O072, O077, O082, O223, O225, O882, O871, O873, 28944, 321, 37703, 450, 45100, 45108-9, 45190, 45192, 45199, 452-3, 59323, 671, 67399 |
| Any arterial thrombosis                          | The Danish National Patient Registry                                                                | 1977-2017              | The International Classification of Diseases and Related Health Problems, 10th & 8th revision                                                             | G951G, H341A, H341B, I21, I240, I513, I630-5, I638, I639, I64, I74, K550C, K550H, N280A, N280, 37702, 410, 433-4, 444                                                                                               |
| Any cardiovascular disease other than thrombosis | The Danish National Patient Registry & The Danish National Registry of Medicinal Product Statistics | 1977-2017 & 1995-2017  | The International Classification of Diseases and Related Health Problems, 10th & 8th revision & The Anatomical Therapeutic Chemical Classification System | (minus the codes for thromboses)<br>I01-99, 391-458 & C                                                                                                                                                             |
| Diabetes mellitus                                | The Danish National Registry of Medicinal Product Statistics                                        | 1995-2017              | The Anatomical Therapeutic Chemical Classification System                                                                                                 | A10                                                                                                                                                                                                                 |
| Cancer                                           | The Danish National Patient Registry                                                                | 1977-2017              | The International Classification of Diseases and Related Health Problems, 10th & 8th revision                                                             | C, 14-20                                                                                                                                                                                                            |
| Musculoskeletal disorders                        | The Danish National Patient Registry                                                                | 1977-2017              | The International Classification of Diseases and Related Health Problems, 10th & 8th revision                                                             | M, 71-3                                                                                                                                                                                                             |
| Liver disease                                    | The Danish National Patient Registry                                                                | 1977-2017              | The International Classification of Diseases and Related Health Problems, 10th & 8th revision                                                             | K70-7, 570-3                                                                                                                                                                                                        |
| Chronic kidney disease/dialysis                  | The Danish National Patient Registry                                                                | 1977-2017              | The International Classification of Diseases and Related Health Problems, 10th revision & The Danish Classification System for Non-Surgical Procedures    | N18-9 & BJFD, 92390,92400,94300,94340                                                                                                                                                                               |

|                                   |                                                              |           |                                                                                                                                  |                                                                                      |
|-----------------------------------|--------------------------------------------------------------|-----------|----------------------------------------------------------------------------------------------------------------------------------|--------------------------------------------------------------------------------------|
| Thrombophilia                     | The Danish National Patient Registry                         | 1994-2017 | The International Classification of Diseases and Related Health Problems, 10th revision                                          | D685, D686                                                                           |
| Endometriosis                     | The Danish National Patient Registry                         | 1977-2017 | The International Classification of Diseases and Related Health Problems, 10th & 8th revision                                    | N80, 6253                                                                            |
| Polycystic ovary syndrome         | The Danish National Patient Registry                         | 1977-2017 | The International Classification of Diseases and Related Health Problems, 10th & 8th revision                                    | E282, 25690                                                                          |
| Thyroid disease                   | The Danish National Registry of Medicinal Product Statistics | 1995-2017 | The Anatomical Therapeutic Chemical Classification System                                                                        | H03                                                                                  |
| Use of tranexamic acid            | The Danish National Registry of Medicinal Product Statistics | 1995-2017 | The Anatomical Therapeutic Chemical Classification System                                                                        | B02AA02                                                                              |
| Use of anticoagulative medication | The Danish National Registry of Medicinal Product Statistics | 1995-2017 | The Anatomical Therapeutic Chemical Classification System                                                                        | B01                                                                                  |
| Hysterectomy                      | The Danish National Patient Registry                         | 1977-2017 | The Danish Classification of Surgical Procedures & The Nordic Medico-Statistical Committee Classification of Surgical Procedures | KLCC10, KLCC11, KLCC20, KLCD, 61000, 61020, 61040, 61050, 61100, 72110, 72230, 72650 |
| Bilateral oophorectomy            | The Danish National Patient Registry                         | 1977-2017 | The Danish Classification of Surgical Procedures & The Nordic Medico-Statistical Committee Classification of Surgical Procedures | KLAE2, KLA1, 60120, 60121, 60320, 70210, 70310                                       |
| Second unilateral oophorectomy    | The Danish National Patient Registry                         | 1977-2017 | The Danish Classification of Surgical Procedures & The Nordic Medico-Statistical Committee Classification of Surgical Procedures | KLAE1, KLA1, 60100, 60300, 60101, 70200                                              |
| Use of hormone therapy            | The Danish National Registry of Medicinal Product Statistics | 1995-2017 | The Anatomical Therapeutic Chemical Classification System                                                                        | G03C, G03F, G03HB01 (only the drug by the product name Climen)                       |
| Infertility treatment             | The Danish National Registry of Medicinal Product Statistics | 1995-2017 | The Anatomical Therapeutic Chemical Classification System                                                                        | G03G                                                                                 |

**Table E:** Use of ibuprofen, diclofenac, and naproxen in the cohort according to drug unit size stratified on hormonal contraception use

|                           | NSAID use only                                        | Concomitant use of NSAID and     |                                    |                                    |
|---------------------------|-------------------------------------------------------|----------------------------------|------------------------------------|------------------------------------|
|                           |                                                       | High-risk hormonal contraception | Medium-risk hormonal contraception | Low/no-risk hormonal contraception |
| <b>Ibuprofen</b>          |                                                       |                                  |                                    |                                    |
| Total no. of person-years | 28,586                                                | 11,294                           | 5039                               | 4394                               |
|                           | <i>Column percentage of total no. of person-years</i> |                                  |                                    |                                    |
| 20 mg                     | 0.0                                                   | 0.0                              | 0.0                                | 0.0                                |
| 200 mg                    | 3.4                                                   | 2.6                              | 4.9                                | 5.8                                |
| 400 mg                    | 44.0                                                  | 42.5                             | 49.9                               | 47.8                               |
| 600 mg                    | 52.6                                                  | 55.4                             | 45.5                               | 46.4                               |
| 800 mg                    | 2.2                                                   | 1.7                              | 1.6                                | 2.0                                |
| <b>Diclofenac</b>         |                                                       |                                  |                                    |                                    |
| Total no. of person-years | 11,162                                                | 4431                             | 1480                               | 1074                               |
|                           | <i>Column percentage of total no. of person-years</i> |                                  |                                    |                                    |
| 12.5 mg                   | 6.2                                                   | 4.3                              | 4.0                                | 6.0                                |
| 25 mg                     | 0.9                                                   | 0.7                              | 0.7                                | 0.6                                |
| 50 mg                     | 64.2                                                  | 69.0                             | 67.5                               | 60.5                               |
| 75 mg                     | 9.6                                                   | 9.0                              | 8.6                                | 11.4                               |
| 100 mg                    | 19.1                                                  | 17.0                             | 19.3                               | 22.1                               |
| <b>Naproxen</b>           |                                                       |                                  |                                    |                                    |
| Total no. of person-years | 3426                                                  | 1266                             | 499                                | 273                                |
|                           | <i>Column percentage of total no. of person-years</i> |                                  |                                    |                                    |
| 25 mg                     | 0.6                                                   | 0.3                              | 0.4                                | 0.5                                |
| 125 mg                    | 0.0                                                   | 0.0                              | 0.0                                | 0.1                                |
| 250-375 mg                | 23.4                                                  | 21.3                             | 20.2                               | 16.5                               |
| 500-550 mg                | 75.9                                                  | 78.4                             | 78.8                               | 82.8                               |
| 750 mg                    | 0.4                                                   | 0.2                              | 0.2                                | 0.3                                |
| 1000 mg                   | 0.1                                                   | 0.0                              | 0.0                                | 0.0                                |

**Table F: Mode of administration of purchased hormonal contraception according to exposure status**

| Exposure                                                    | No. of Person-Yr | Mode of Administration of Hormonal Contraception   |       |              |           |                     |
|-------------------------------------------------------------|------------------|----------------------------------------------------|-------|--------------|-----------|---------------------|
|                                                             |                  | Oral                                               | Patch | Vaginal Ring | Injection | Intrauterine system |
|                                                             |                  | <i>Row percentage of total no. of person-years</i> |       |              |           |                     |
| <b>Hormonal contraception use only</b>                      |                  |                                                    |       |              |           |                     |
| High-risk hormonal contraception                            | 4,298,461        | 97.6                                               | 0.3   | 2.1          |           |                     |
| Medium-risk hormonal contraception                          | 1,852,352        | 98.7                                               |       |              | 1.3       |                     |
| Low/no-risk hormonal contraception                          | 1,116,421        | 20.8                                               |       |              |           | 4.9 74.3            |
| <b>Concomitant use of hormonal contraception and NSAIDs</b> |                  |                                                    |       |              |           |                     |
| High-risk hormonal contraception and any NSAID              | 20,036           | 97.2                                               | 0.4   | 2.4          |           |                     |
| Medium-risk hormonal contraception and any NSAID            | 8073             | 97.8                                               |       |              | 2.2       |                     |
| Low/no-risk hormonal contraception and any NSAID            | 6497             | 5.6                                                |       |              |           | 5.0 89.4            |



**Table G:** Adjusted incidence rate ratios of venous thromboembolism according to hormonal contraception use only, NSAID use only, and concomitant use of hormonal contraception and NSAIDs with non-use as the reference in the subpopulation of “healthy” women \*

| Exposure                                                    | No. of Person-Yr | No. of Events | Adjusted Incidence Rate Ratio** (95% CI) |
|-------------------------------------------------------------|------------------|---------------|------------------------------------------|
| Non-use of hormonal contraception and NSAIDs                | 8,596,336        | 1085          | 1.0<br>(Reference)                       |
| <b>Hormonal contraception use only</b>                      |                  |               |                                          |
| High-risk hormonal contraception                            | 2,602,196        | 1322          | 5.7<br>(5.2 to 6.2)                      |
| Medium-risk hormonal contraception                          | 1,088,425        | 382           | 4.1<br>(3.6 to 4.6)                      |
| Low/no-risk hormonal contraception                          | 348,161          | 51            | 1.1<br>(0.8 to 1.5)                      |
| <b>NSAID use only</b>                                       |                  |               |                                          |
| Any                                                         | 17,060           | 37            | 15.0<br>(10.8 to 20.8)                   |
| Ibuprofen                                                   | 9245             | 19            | 14.3<br>(9.1 to 22.5)                    |
| Diclofenac                                                  | 3830             | 13            | 22.9<br>(13.2 to 39.5)                   |
| Naproxen                                                    | 1533             | 0             | -                                        |
| <b>Concomitant use of hormonal contraception and NSAIDs</b> |                  |               |                                          |
| High-risk hormonal contraception and any NSAID              | 7920             | 87            | 111.7<br>(89.6 to 139.3)                 |
| Medium-risk hormonal contraception and any NSAID            | 3021             | 13            | 43.2<br>(25.0 to 74.6)                   |
| Low/no-risk hormonal contraception and any NSAID            | 1079             | <3            | 13.0<br>(3.2 to 51.9)                    |

\* Exclusion and censoring criteria defined in Table S4

\*\* Adjusted for age, calendar time, and educational level

**Table H:** Adjusted incidence rate ratios of venous thromboembolism with use of NSAIDs compared to non-use according to hormonal contraception use for different sensitivity analyses.

| Exposure                                      | Main analysis*        | Only confirmed diagnoses* | Including diagnoses given in the emergency room* | Only 15-39-year-old women* | Sub-population of healthy women only** | NSAID exposure window of 30 days from prescription redemption* |
|-----------------------------------------------|-----------------------|---------------------------|--------------------------------------------------|----------------------------|----------------------------------------|----------------------------------------------------------------|
| Non-use of NSAIDs and hormonal contraception  | 1.0<br>(Reference)    | 1.0<br>(Reference)        | 1.0<br>(Reference)                               | 1.0<br>(Reference)         | 1.0<br>(Reference)                     | 1.0<br>(Reference)                                             |
| NSAID use only                                | 7.2<br>(6.0 to 8.5)   | 7.9<br>(6.5 to 9.6)       | 7.4<br>(6.4 to 8.7)                              | 7.9<br>(5.9 to 10.6)       | 15.0<br>(10.8 to 20.8)                 | 4.8<br>(4.4 to 5.4)                                            |
| High-risk hormonal contraception use only     | 1.0<br>(Reference)    | 1.0<br>(Reference)        | 1.0<br>(Reference)                               | 1.0<br>(Reference)         | 1.0<br>(Reference)                     | 1.0<br>(Reference)                                             |
| High-risk hormonal contraception and NSAIDs   | 11.0<br>(9.6 to 12.6) | 11.7<br>(10.1 to 13.3)    | 11.0<br>(9.6 to 12.5)                            | 12.9<br>(11.0 to 15.1)     | 19.6<br>(15.8 to 24.4)                 | 6.4<br>(5.9 to 7.0)                                            |
| Medium-risk hormonal contraception use only   | 1.0<br>(Reference)    | 1.0<br>(Reference)        | 1.0<br>(Reference)                               | 1.0<br>(Reference)         | 1.0<br>(Reference)                     | 1.0<br>(Reference)                                             |
| Medium risk hormonal contraception and NSAIDs | 7.9<br>(5.9 to 10.6)  | 8.9<br>(6.7 to 12.0)      | 7.9<br>(6.0 to 10.2)                             | 7.9<br>(5.5 to 11.5)       | 10.5<br>(6.1 to 18.3)                  | 4.9<br>(4.0 to 5.9)                                            |
| Low/no-risk hormonal contraception use only   | 1.0<br>(Reference)    | 1.0<br>(Reference)        | 1.0<br>(Reference)                               | 1.0<br>(Reference)         | 1.0<br>(Reference)                     | 1.0<br>(Reference)                                             |
| Low/no-risk hormonal contraception and NSAIDs | 4.5<br>(2.6 to 8.1)   | 5.6<br>(3.1 to 10.3)      | 4.6<br>(2.7 to 7.6)                              | 5.5<br>(2.5 to 12.5)       | 3.2<br>(0.8 to 12.7)                   | 2.4<br>(1.6 to 3.5)                                            |

Results from main analysis shown in first column for easier comparison.

Only confirmed diagnoses: Diagnoses given following relevant imaging or followed by prescription redemption of an anticoagulant

\* Incidence rate ratios adjusted for age, calendar time, educational level, hypertension, diabetes, polycystic ovary syndrome, endometriosis, migraine, systemic connective tissue disorders, and inflammatory polyarthropathies.

\*\* Only including women without any history of cardiovascular disorder, diabetes, liver disease, chronic kidney disease, endometriosis, polycystic ovary syndrome, migraine, musculoskeletal disorder, cancer, thrombophilia, use of anticoagulants, thyroid disease, use of tranexamic acid, hysterectomy, bilateral oophorectomy, hormone therapy, and infertility treatment (Supplementary Table SD).
